# Supplementary material for: Anti-Inflammatory Effect of Erinacine C on NO Production Through Down-Regulation of NF-κB and Activation of Nrf2-Mediated HO-1 in BV2 Microglial Cells Treated with LPS
Source: PubMed Central journal article supplement (PMC6766924; doi:10.3390/molecules24183317), 2019-09-12
Supplement: molecules-24-03317-s001.pdf [file molecules-24-03317-s001.pdf]

(A)

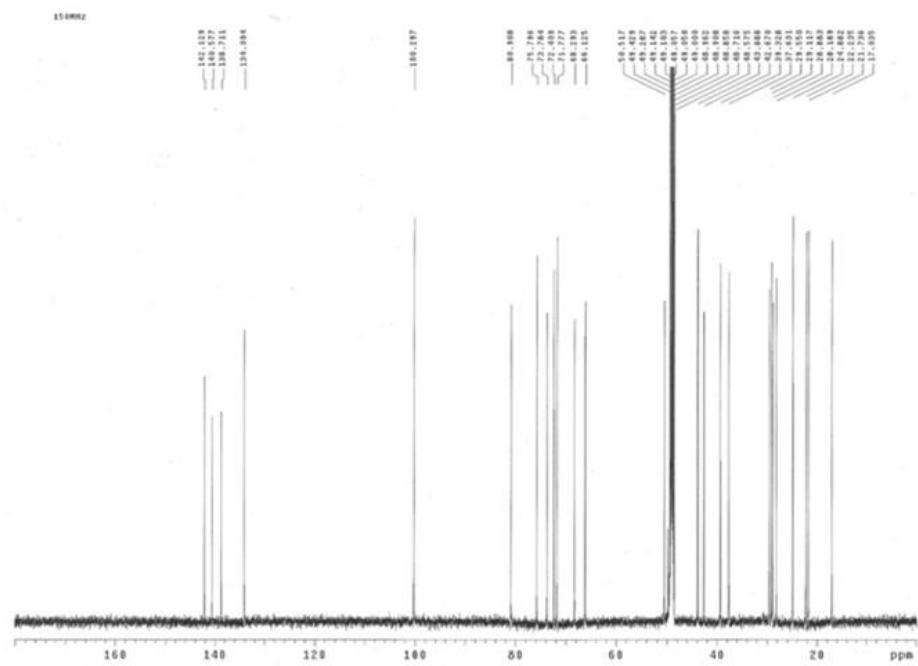

(B)

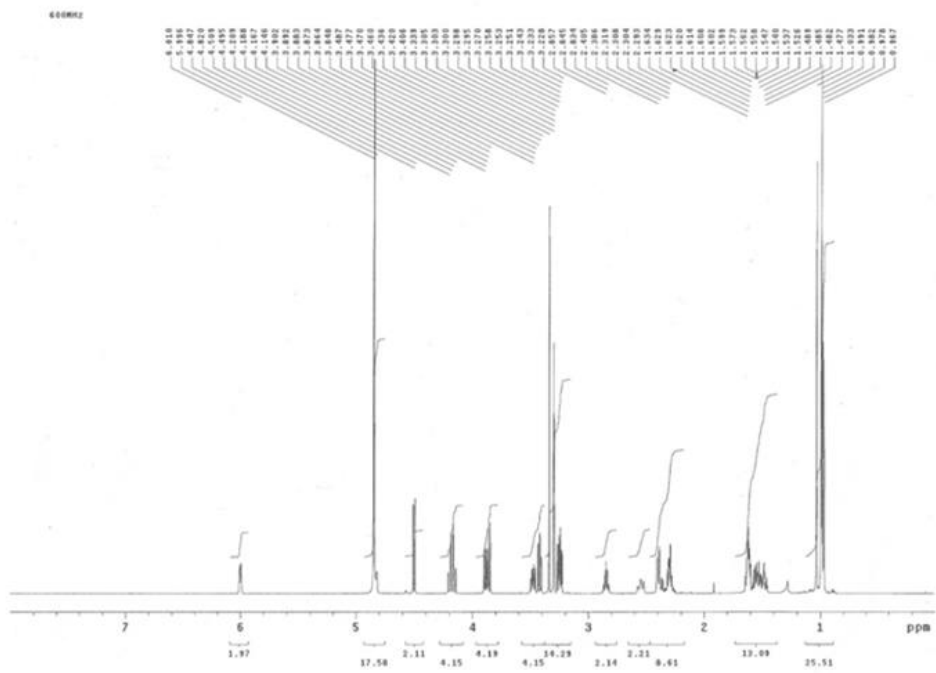

**Supplementary figure 1.**  $^{13}\text{C}$ -NMR spectrum (A) and  $^1\text{H}$ -NMR spectrum (B) of Erinacine C
